# Supplementary material
Source: MDPI journal article supplement (https://www.mdpi.com/2311-5629/8/1/13)
Supplement: s1 [file s1]

# Support Information for

## Compositing Fullerene-Derived Porous Carbon Fibers with Reduced Graphene Oxide for Enhanced ORR Catalytic Performance

Zhimin He, Ziqian Guo, Takeshi Akasaka, Kun Guo\* and Xing Lu\*

State Key Laboratory of Materials Processing and Die & Mould Technology, School of Materials Science and Engineering, Huazhong University of Science and Technology, 1037 Luoyu Road, Wuhan, 430074, China; guok@hust.edu.cn (K.G); lux@hust.edu.cn (X.L.)

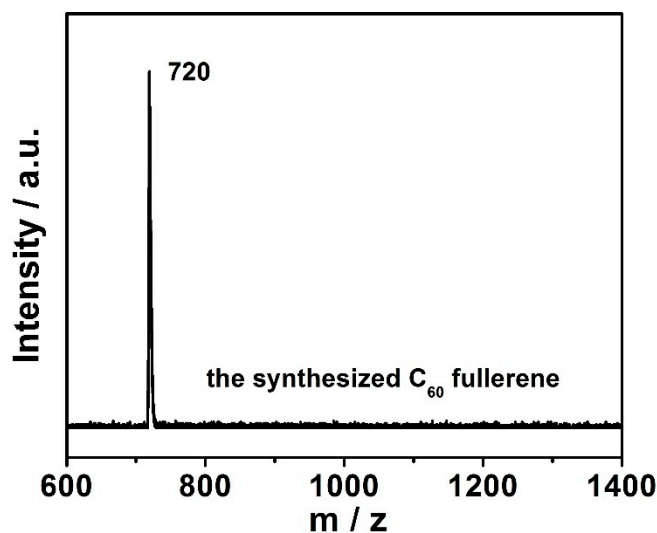

**Figure S1** LDI-TOF mass spectrum of the synthesized C<sub>60</sub> fullerene.

**Table S1** Surface compositions of the as-prepared samples from XPS tests.

| Samples   | C (at.%) | O (at.%) |
|-----------|----------|----------|
| GO        | 74.74    | 25.26    |
| FCFs      | 97.41    | 2.59     |
| FCFs@GO   | 93.06    | 6.94     |
| rGO       | 96.94    | 3.06     |
| FPCFs     | 97.23    | 2.77     |
| FPCFs@rGO | 96.81    | 3.19     |

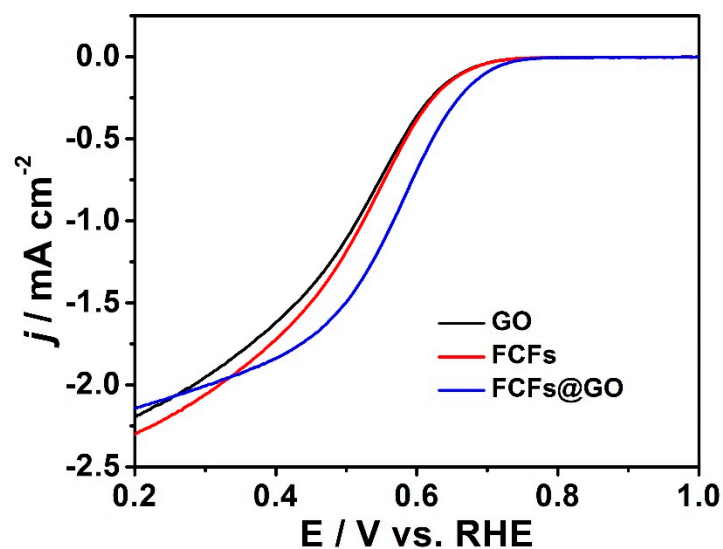

**Figure S2** LSV curves of GO, FCFs and FCFs@GO with an rotation speed of 1600 rpm at 10 mV s<sup>-1</sup>.

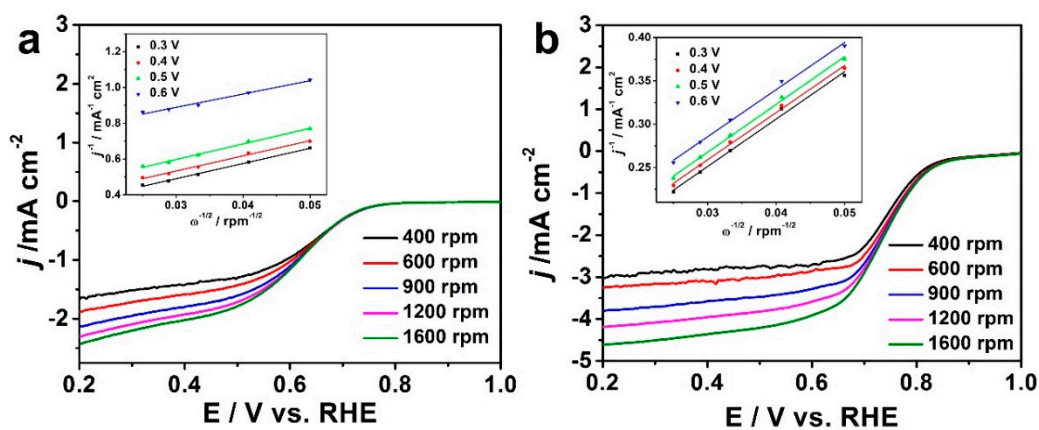

**Figure S3** LSV curves at 10 mV s<sup>-1</sup> and different rotation rates from 400 to 1600 rpm, and the corresponding K-L plots at different potentials of rGO (a) and FPCFs (b).

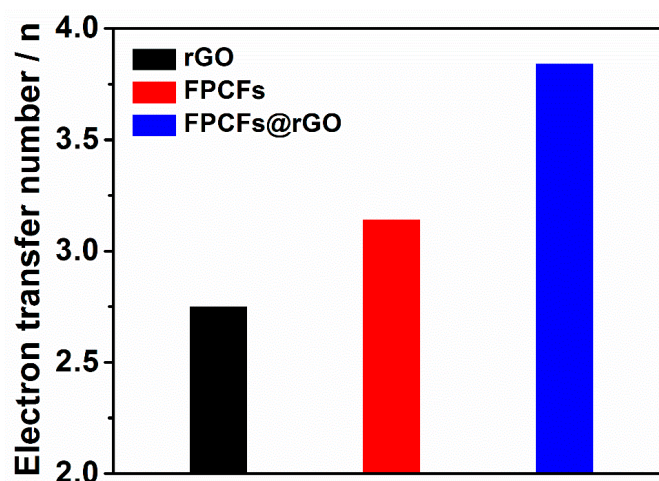

**Figure S4** Average electron transfer number of rGO, FPCFs and FPCFs@rGO.

**Table S2** Comparison of the ORR performance of FPCFs@rGO with recently reported metal-free catalysts in 0.1 M KOH solution.

| Catalyst                 | E <sub>0</sub> (V) | E <sub>1/2</sub> (V) | Reference                                   |
|--------------------------|--------------------|----------------------|---------------------------------------------|
| <b>FPCFs@rGO</b>         | <b>0.895</b>       | <b>0.762</b>         | <b>This work</b>                            |
| NOPHC <sub>10</sub> -900 | 0.90               | 0.77                 | Appl. Catal. B Environ. 2019, 248, 239      |
| MFC <sub>70</sub> -150   | 0.814              | 0.704                | Adv. Funct. Mater. 2018, 28, 1803701        |
| MFC <sub>60</sub> -130   | 0.82               | 0.76                 | Angew. Chem. Int. Ed. 2018, 57, 569         |
| NCN-1000-5               | 0.95               | 0.82                 | Energy Environ. Sci. 2019,12, 322           |
| NKCNPs-900               | 0.92               | 0.79                 | ACS Appl. Mater. Interfaces 2018, 10, 29448 |
| DN-UGNR                  | 0.957              | 0.808                | Adv. Sci., 2018, 5, 1801375                 |
| D/G-CTs-1000             | -                  | 0.841                | Nano Res. 2020, 13, 401                     |
| HHPC                     | 0.90               | 0.78                 | Appl.Catal. B Environ., 2020, 265, 118603   |
| PD/N-C                   | 0.911              | 0.833                | Angew. Chem. Int. Ed. 2019, 58, 3859        |
